# Supplementary material
Source: Research Square preprint supplement (doi:10.21203/rs.3.rs-9512057/v1)
Supplement: Supplementary file 1 [file 434deffdf90de32aea81b1af.docx]

Additional file 2. Each healthy lifestyle habit and focus on opportunities (FOO), stratified by age group

|  | Model 1 | | |  | Model 2 | | |
| --- | --- | --- | --- | --- | --- | --- | --- |
| B | 95% CI | *P* value |  | B | 95% CI | *P* value |
| **Among participants aged < 45 years** |  |  |  |  |  |  |  |
| Adequate sleep | 0.323 | 0.275 to 0.371 | < 0.001 |  | 0.312 | 0.264 to 0.360 | < 0.001 |
| Eating breakfast regularly | 0.076 | 0.025 to 0.126 | 0.003 | 0.047 | -0.003 to 0.098 | 0.065 |
| No excessive snacking | 0.102 | 0.045 to 0.159 | < 0.001 |  | 0.073 | 0.017 to 0.130 | 0.011 |
| Regular physical activity | 0.065 | 0.015 to 0.115 | 0.010 |  | 0.044 | -0.005 to 0.093 | 0.079 |
| Low-risk alcohol consumption | 0.010 | -0.050 to 0.070 | 0.745 |  | 0.006 | -0.054 to 0.066 | 0.842 |
| Non-smoking | 0.109 | 0.040 to 0.178 | 0.002 |  | 0.096 | 0.026 to 0.166 | 0.007 |
| Adequate body mass index | 0.063 | 0.013 to 0.112 | 0.013 |  | 0.043 | -0.006 to 0.092 | 0.084 |
| **Among participants aged ≥45 years** |  |  |  |  |  |  |  |
| Adequate sleep | 0.283 | 0.242 to 0.324 | < 0.001 |  | 0.264 | 0.223 to 0.305 | < 0.001 |
| Eating breakfast regularly | 0.070 | 0.015 to 0.125 | 0.013 |  | 0.045 | -0.009 to 0.100 | 0.104 |
| No excessive snacking | 0.130 | 0.074 to 0.186 | < 0.001 |  | 0.099 | 0.043 to 0.154 | 0.001 |
| Regular physical activity | 0.166 | 0.124 to 0.207 | < 0.001 |  | 0.135 | 0.094 to 0.176 | < 0.001 |
| Low-risk alcohol consumption | -0.044 | -0.089 to 0.000 | 0.049 |  | -0.020 | -0.064 to 0.024 | 0.376 |
| Non-smoking | 0.063 | 0.010 to 0.116 | 0.021 |  | 0.058 | 0.005 to 0.111 | 0.032 |
| Adequate body mass index | 0.044 | 0.003 to 0.085 | 0.036 |  | 0.032 | -0.008 to 0.073 | 0.119 |

Model 1: age, sex, education, employment status, and occupation

Model 2: additionally adjusted for all other lifestyle behaviors.

Analyses were conducted using multilevel linear regression models nested within companies.

B, unstandardized regression coefficients; CI, confidence interval.
