# Supplementary material
Source: Research Square preprint supplement (doi:10.21203/rs.3.rs-9512057/v1)
Supplement: Supplementary file 2 [file 79c11fe080d81c8d53cd3f9d.docx]

Additional file 1. Questionnaire items for lifestyle habit assessment

| Lifestyle habit | Questionnaire item | Response options | Classification as "good" habit |
| --- | --- | --- | --- |
| Sleep | Do you feel refreshed after a night's sleep? | Yes / No | Yes |
| Breakfast consumption | Do you skip breakfast three or more times a week? | Yes / No | No |
| Snacking | How often do you eat snacks or drink sweet beverages between meals? | 1. Every day  2. Occasionally  3. Almost never | Response 2 or 3 |
| Physical activity | Have you exercised moderately (enough to produce a light sweat) for 30 minutes or more at least twice a week for at least one year? | Yes / No | Yes |
| Alcohol consumption | How often do you drink alcoholic beverages (Japanese sake or shochu, beer, wine, etc.)? † | 1. Every day  2. Five or six days a week  3. Three or four days a week  4. Once or twice a week  5. One to three days a month  6. Less than once a month  7. I quit drinking  8. I don't drink (I can't drink) | Estimated average daily intake < 40 g (males) or < 20 g (females) |
| How much do you drink a day? †† | 1. Less than 1 drink/day  2. 1 to <2 drinks/day  3. 2 to <3 drinks/day  4. 3 to <5 drinks/day  5. ≥5 drinks/day |
| Smoking | Are you a regular smoker? ††† | 1. Yes (I meet both conditions.)  2. I used to smoke, but I have not smoked in the last month. (I meet only the second condition.)  3. No (I meet neither condition.) | Response 2 or 3 |

† "I quit drinking" refers to those who used to drink at least once a month but have not had alcoholic beverages for at least a year.

†† One drink means 180 mL of a beverage that contains 15% alcohol, or about: 500 mL of beer (5% alcohol), 110 mL of shochu (25% alcohol), 180 mL of wine (14% alcohol), 60 mL of whiskey (43% alcohol), 350 mL or 500 mL of sour-type mixed drinks sold in cans (7% or 5% alcohol, respectively).

††† You are a regular smoker if you meet the following two conditions: 1. You have smoked in the last month. 2. You have smoked for at least six months in the past, or you have smoked a total of at least 100 cigarettes over the course of your life.
